# Supplementary material for: Tumor Nonimmune-Microenvironment-Related Gene Expression Signature Predicts Brain Metastasis in Lung Adenocarcinoma Patients after Surgery: A Machine Learning Approach Using Gene Expression Profiling
Source: MDPI journal article supplement (doi:10.3390/cancers13174468), 2021-09-05
Supplement: s1 [file s1]

# Tumor Nonimmune-Microenvironment-Related Gene Expression Signature Predicts Brain Metastasis in Lung Adenocarcinoma Patients after Surgery: A Machine Learning Approach Using Gene Expression Profiling

Seokjin Haam, Jae-Ho Han, Hyun Woo Lee and Young Wha Koh

Supplementary Materials

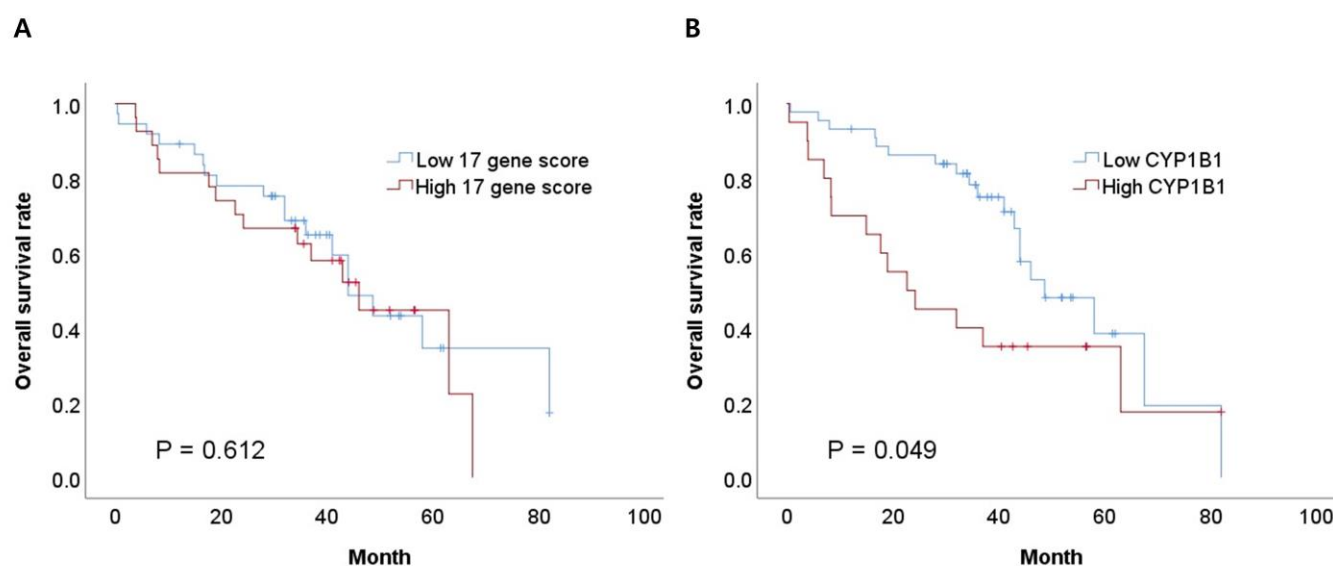

**Figure S1.** Overall survival rates and 17-gene score (A) and overall survival rates and CYP1B1 (B).

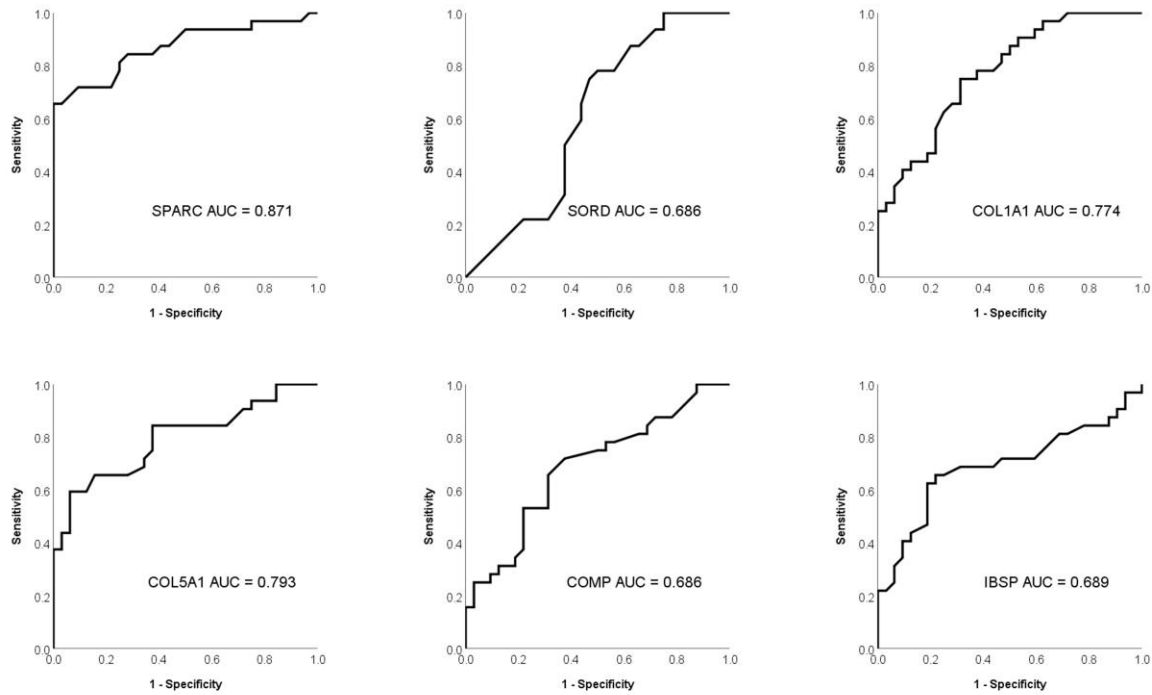

**Figure S3.** Comparison of AUC according to SPARC, SORD, COL1A1, COL5A1, COMP, and IBSP protein expression.

**Table S1.** Ranking-based feature selection methods.

| Method                              | SVM AUC | RF AUC | NN AUC | NB AUC | Sum of AUC |
|-------------------------------------|---------|--------|--------|--------|------------|
| Information gain (17 feature)       | 0.737   | 0.807  | 0.729  | 0.906  | 3.179      |
| Information gain ratio (17 feature) | 0.747   | 0.790  | 0.736  | 0.906  | 3.179      |
| Gini decrease (17 feature)          | 0.747   | 0.821  | 0.731  | 0.905  | 3.204      |
| Chi-square (17 feature)             | 0.849   | 0.858  | 0.839  | 0.845  | 3.391      |
| ReliefF (17 feature)                | 0.843   | 0.749  | 0.857  | 0.798  | 3.247      |

**Table S2.** Extracranial metastasis in group without brain metastasis and group with brain metastasis.

| Extracranial metastasis | Brain metastasis positive | Brain metastasis negative | <i>p</i> value |
|-------------------------|---------------------------|---------------------------|----------------|
| Absent                  | 17 (53.1%)                | 18 (56.3%)                | > 0.999        |
| Present                 | 15 (46.9%)                | 14 (43.8%)                |                |

**Table S3.** 116 genes with elevated or reduced expression in the brain metastasis group (*p* value < 0.05).

| 86 elevated genes                                                                                                                                                                                                                                                                                                                                                                                                                                                                       |
|-----------------------------------------------------------------------------------------------------------------------------------------------------------------------------------------------------------------------------------------------------------------------------------------------------------------------------------------------------------------------------------------------------------------------------------------------------------------------------------------|
| ACVRL1, ADAMTS12, AEBP1, APC, APOD, APOE, APOH, ASPN, BNC2, CALD1, CAMK2A, CAMK2B, CAMP, CCL8, CCR3, CDH11, CDK14, COL18A1, COL1A1, COL1A2, COL5A1, COL5A2, COL6A2, COMP, CSPG4, CTSK, CYP1B1, DCN, DPYSL3, ECM2, EDN1, EGFL7, EGFR, FAP, FBN1, FMOD, FOXC2, FSTL1, GDF6, HAS1, HSPG2, IBSP, ICAM1, IGFBP4, IGFBP7, IL1RL1, ISLR, ITGA11, ITGA7, JAM2, KIAA1462, LAMA4, MEG3, MMP13, MMP17, MMP24, MYLK, NAP1L3, NR4A1, NR4A3, OGN, OLFML2B, PCOLCE, PDPN, PLXNC1, PMP22, PRELP, PRSS8, |

|                                                                                                                                                                                                           |
|-----------------------------------------------------------------------------------------------------------------------------------------------------------------------------------------------------------|
| PYCARD, RUNX1T1, SERPINH1, SFRP2, SNAI2, SPARC, SRPX2, TAL1, TCF4, THBS1, THBS4, THY1, TIMP2, TNFRSF12A, TXNIP, VEGFC, ZCCHC24, ZEB1                                                                      |
| 30 reduced genes                                                                                                                                                                                          |
| ARHGAP32, BTG1, CBLC, EIF4EBP1, ERBB3, ERMP1, GRHL2, HIPK2, HK2, HSP90B1, MED1, NCL, NME1, NRCAM, PDCD10, POPDC3, PROM1, RBL1, RPS27A, SACS, SMAD3, SMC3, SNRPF, SORD, ST14, SYK, TCEB1, TF, TJP2, TOM1L1 |

**Table S4.** multivariate logistic analyses for brain metastasis.

|        | <b>OR</b> | <b>95%CI</b> | <b>p-value†</b> |
|--------|-----------|--------------|-----------------|
| SPARC  | 38.78     | 3.246-463.6  | 0.004           |
| SORD   | 0.305     | 0.030-3.146  | 0.319           |
| COL1A1 | 8.351     | 0.999-69.83  | 0.051           |
| COL5A1 | 8.566     | 1.436-51.09  | 0.018           |
| COMP   | 5.499     | 0.751-40.28  | 0.093           |
| IBSP   | 4.689     | 0.549-40.03  | 0.158           |

**Table S5.** Demographic and clinical characteristics of patients.

| <b>Variable</b>             | <b>Brain metastasis, number (%)</b> | <b>No brain metastasis, number (%)</b> | <b>p value</b> |
|-----------------------------|-------------------------------------|----------------------------------------|----------------|
| Age, median (range) (years) | 57.5 (35–78)                        | 65.5 (47–86)                           | 0.082          |
| Male sex                    | 22 (68.8%)                          | 19 (59.4%)                             | 0.603          |
| Smoking history             | 11 (39.3%)                          | 11 (36.7%)                             | >0.999         |
| Pathologic TNM stage        |                                     |                                        |                |
| I                           | 8 (25%)                             | 8 (25%)                                |                |
| II                          | 5 (15.6%)                           | 5 (15.6%)                              |                |
| III                         | 19 (59.4%)                          | 19 (59.4%)                             |                |
| Histologic subtype          |                                     |                                        | 0.236          |
| Acinar                      | 14 (43.8%)                          | 10 (31.3%)                             |                |
| Papillary                   | 5 (15.6%)                           | 5 (15.6%)                              |                |
| Lepidic                     | 0 (0%)                              | 4 (12.5%)                              |                |
| Micropapillary              | 3 (9.4%)                            | 1 (3.1%)                               |                |
| Solid                       | 10 (31.3%)                          | 12 (37.5%)                             |                |
| ALK translocation           | 1 (3.1%)                            | 0 (0%)                                 | >0.999         |

Smoking history was collected for 28 patients for group with brain metastasis and 30 patients for group without brain metastasis.

**Table S6.** Information on the used antibodies for immunohistochemistry.

| <b>Name</b> | <b>Clonality</b>  | <b>Clone name</b> | <b>Catalog name</b> | <b>Dilution</b> | <b>Manufacturer</b> |
|-------------|-------------------|-------------------|---------------------|-----------------|---------------------|
| SPARC       | Rabbit polyclonal |                   | ab203284            | 1:200           | Abcam               |
| SORD        | Rabbit polyclonal |                   | ab7046              | 1:200           | Novus Biologicals   |
| COL1A1      | Rabbit polyclonal |                   | ab34710             | 1:100           | Abcam               |
| COL5A1      | Rabbit polyclonal |                   | ab7046              | 1:50            | Abcam               |
| COMP        | Rabbit polyclonal |                   | ab231977            | 1:50            | Abcam               |
| IBSP        | Rabbit polyclonal |                   | ab52128             | 1:300           | Abcam               |
| THBS4       | Rabbit polyclonal |                   | S2121540            | 1:100           | Mybiosource         |
