# Supplementary figures and images for: Tumor Nonimmune-Microenvironment-Related Gene Expression Signature Predicts Brain Metastasis in Lung Adenocarcinoma Patients after Surgery: A Machine Learning Approach Using Gene Expression Profiling
Source: MDPI journal article supplement (doi:10.3390/cancers13174468), 2021-09-05

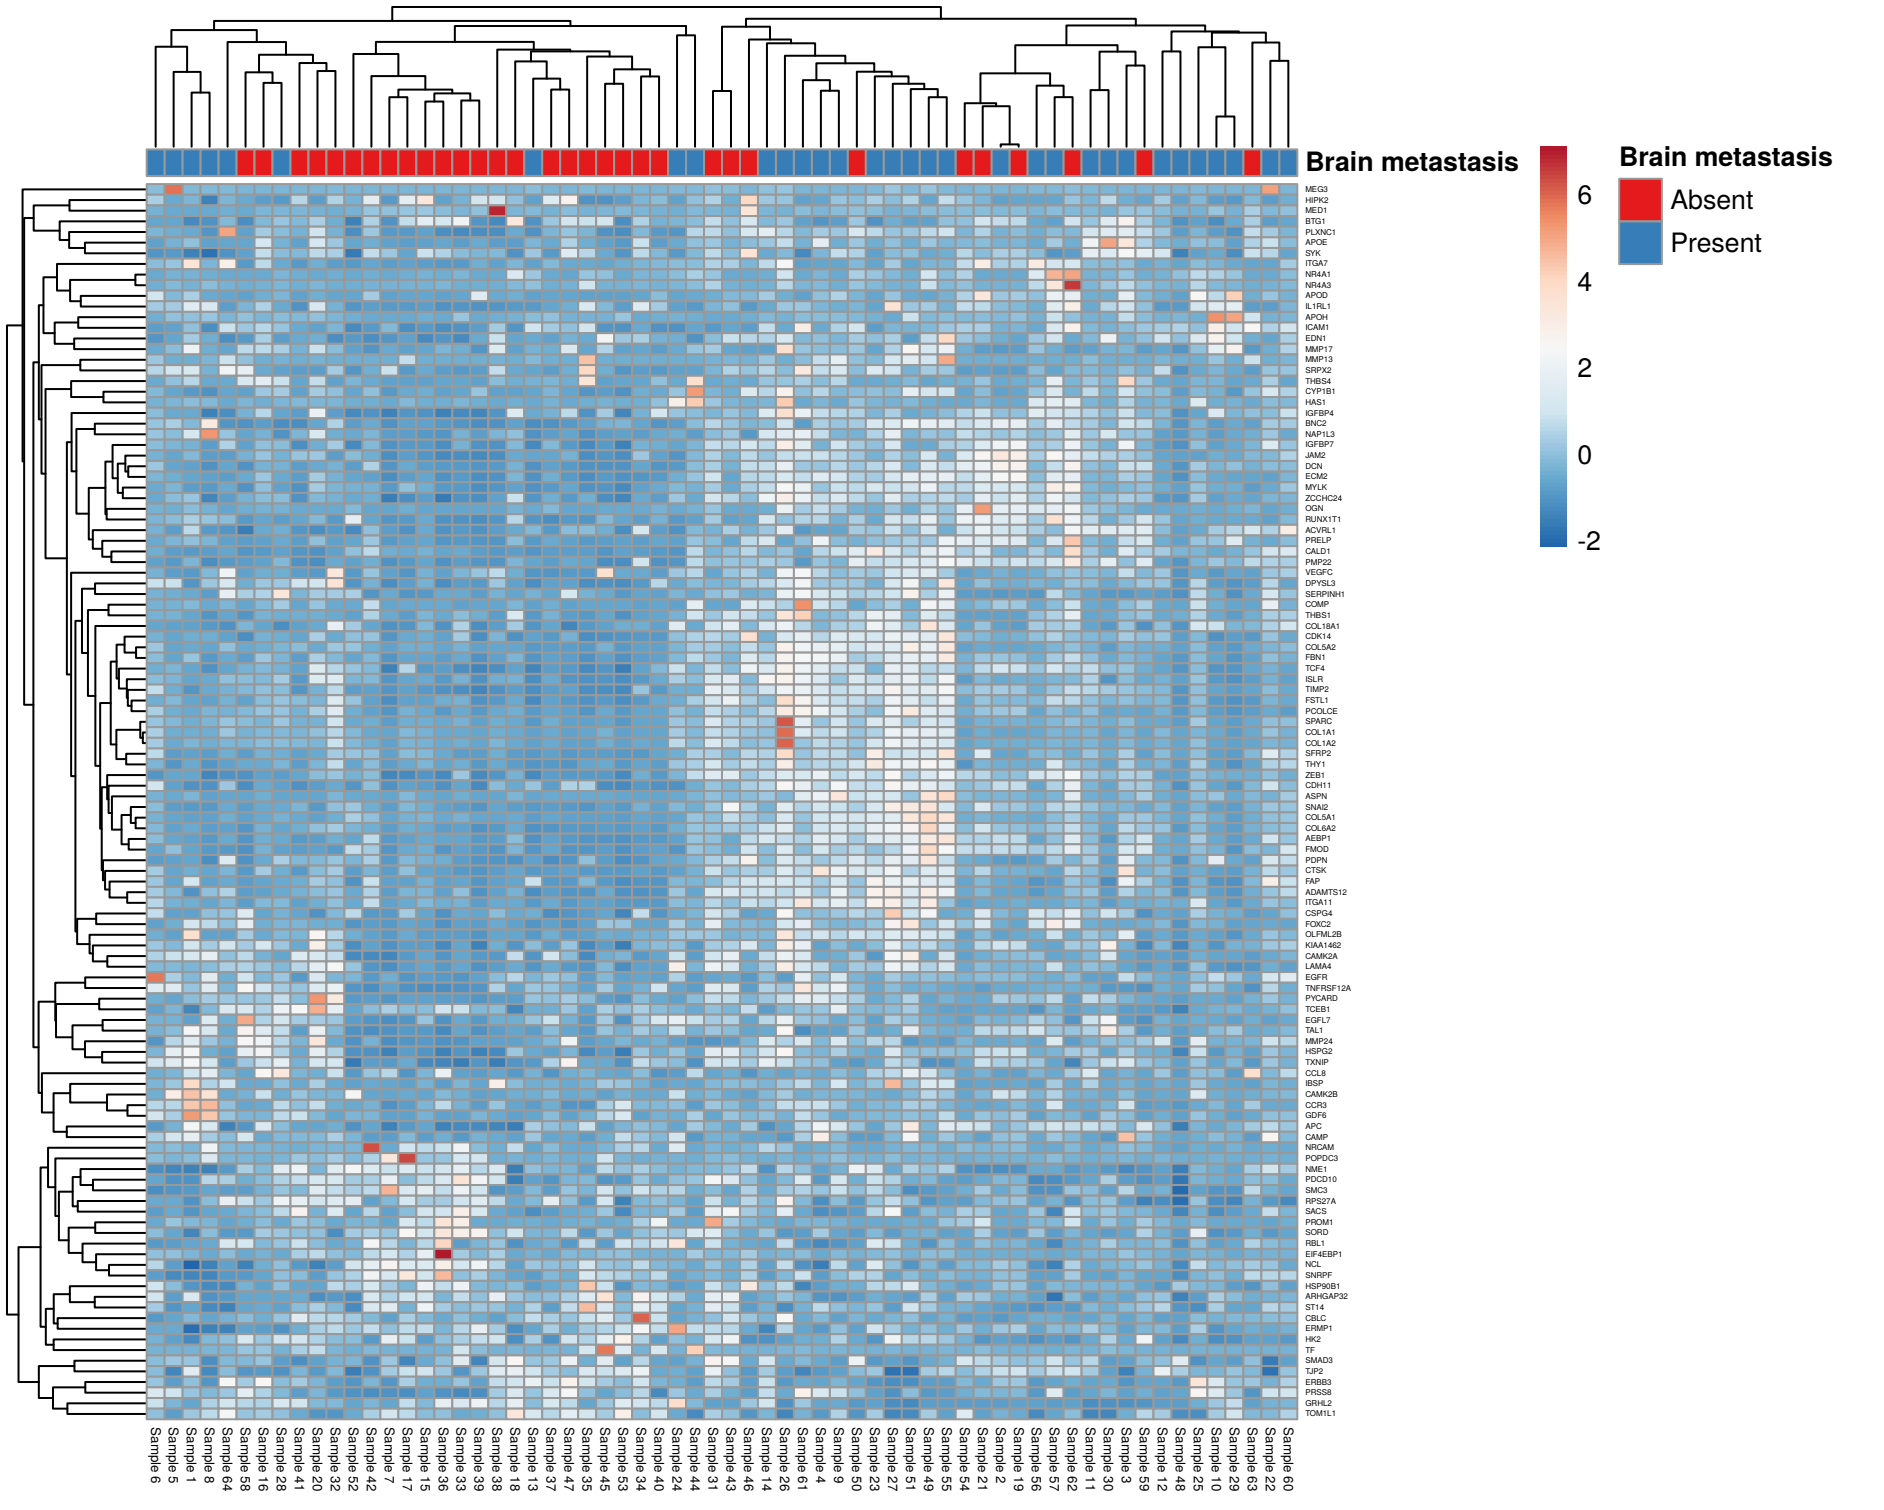

Supplement: s1 [file s1]
